# Supplementary material
Source: publisher site journal article supplement (https://www.dovepress.com/get_supplementary_file.php?f=222854.docx)
Supplement: Supplementary file 1 [file get_supplementary_file.php]

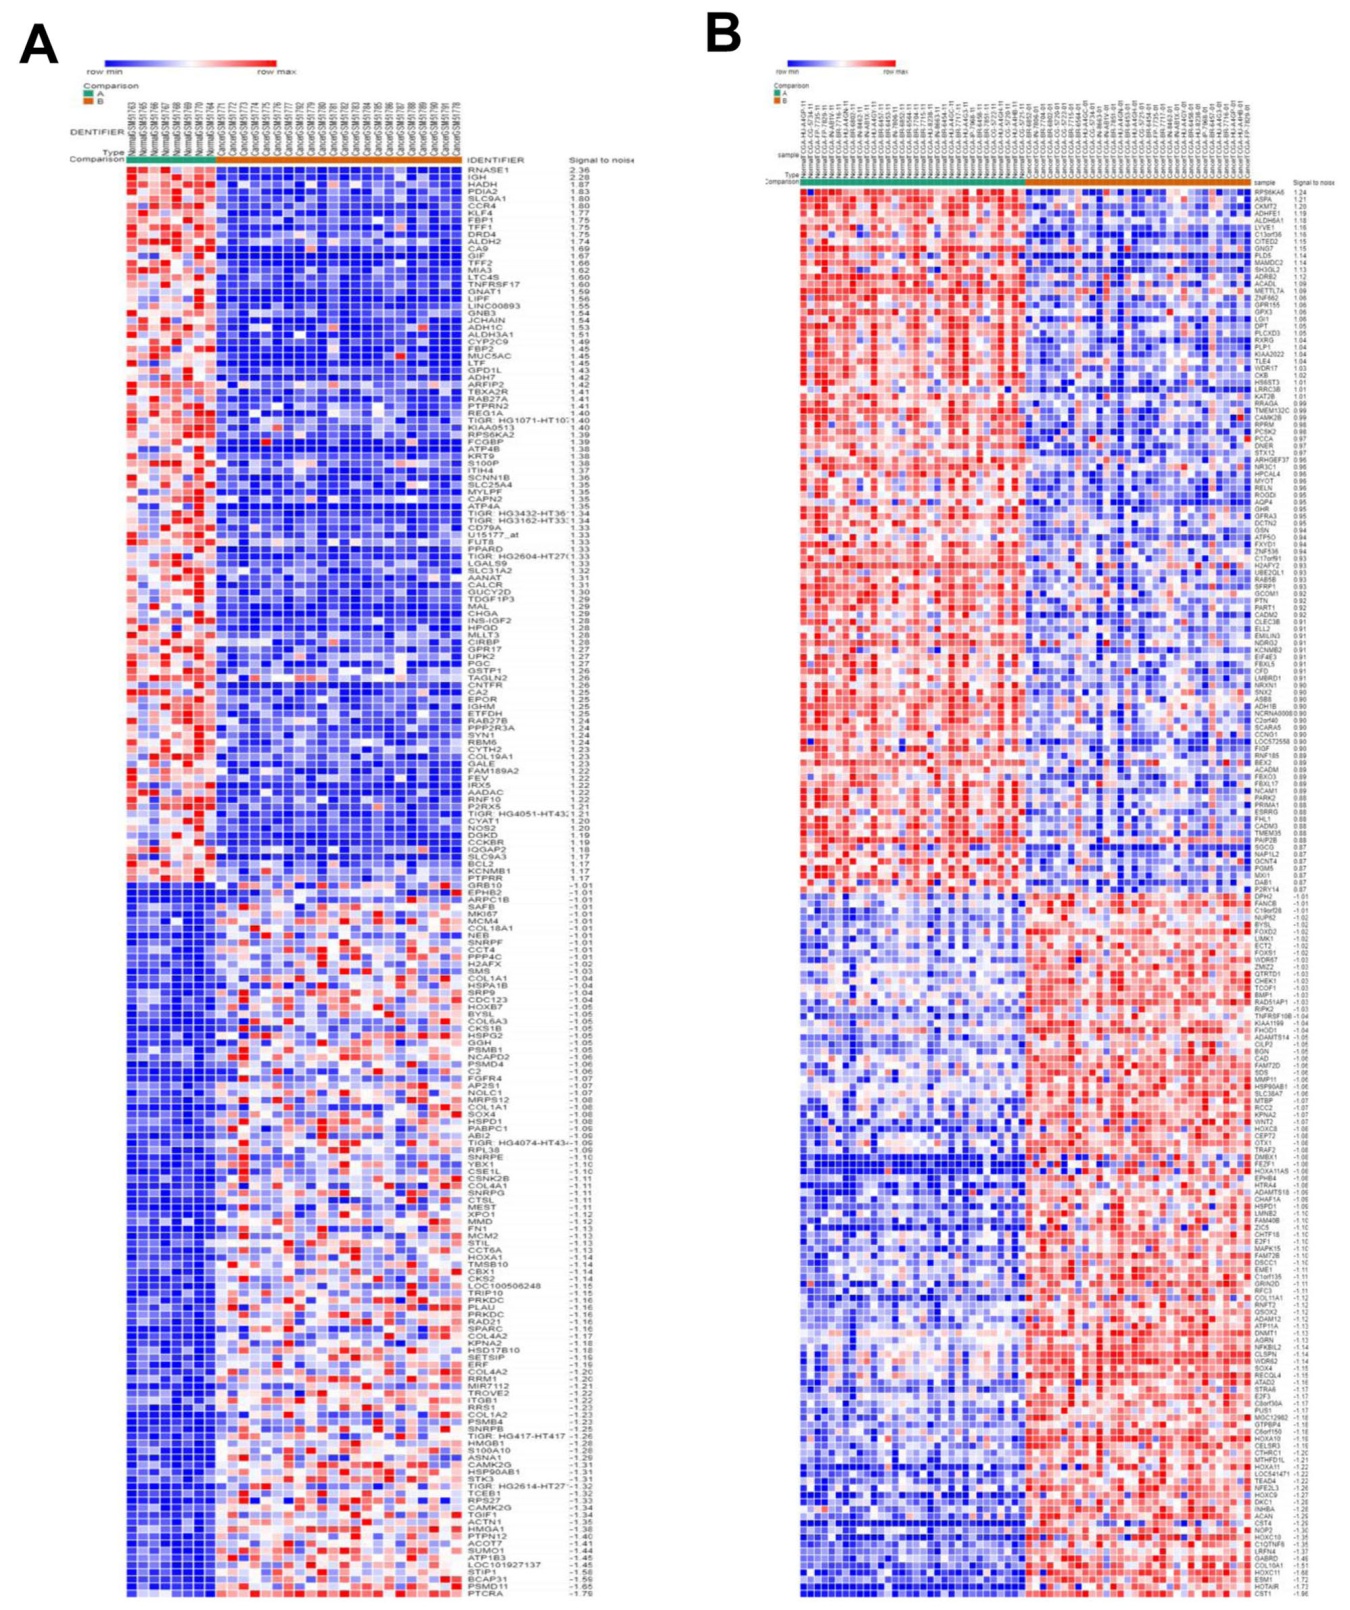


**Supplementary** **Figure 1.** Heat map of differentially expressed genes in gastric cancer. The GEO database (A), including 22 gastric cancer samples and 8 normal gastritis epithelial samples, and, the TCGA database (B), including 32 gastric cancer samples and 32 normal gastritis epithelial samples, were used.The blue portion of the figure indicates a gene that is lowly expressed in tumor sample compared to normal sample, and the red portion indicates a gene that is highly expressed in tumor sample as compared with normal sample.


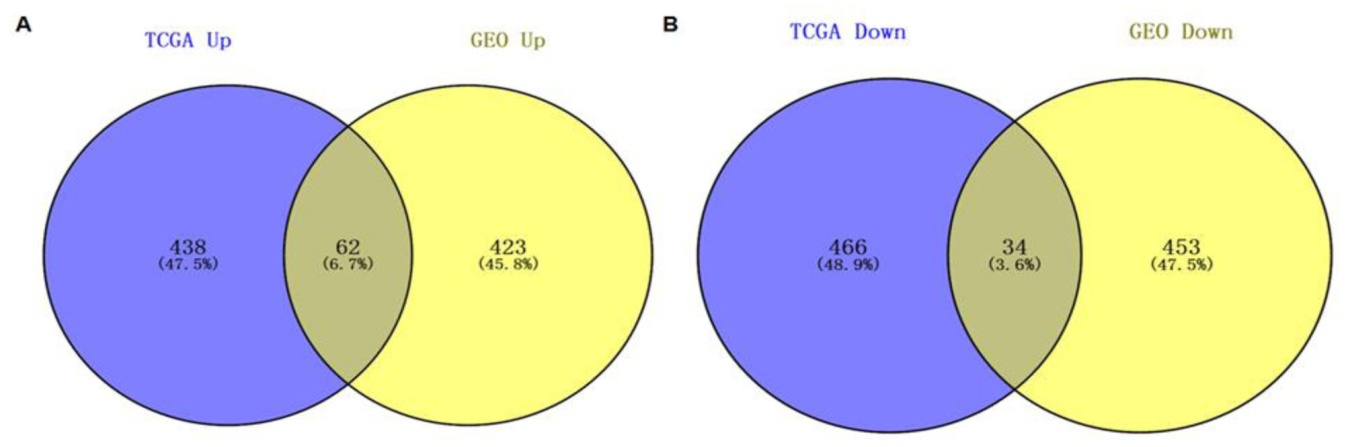


**Supplementary Figure 2.** Intersection of differentially expressed genes from the GEO database and the TCGA database. (A) The up-regulated genes from the different databases. (B) The down-regulated genes from the different databases.


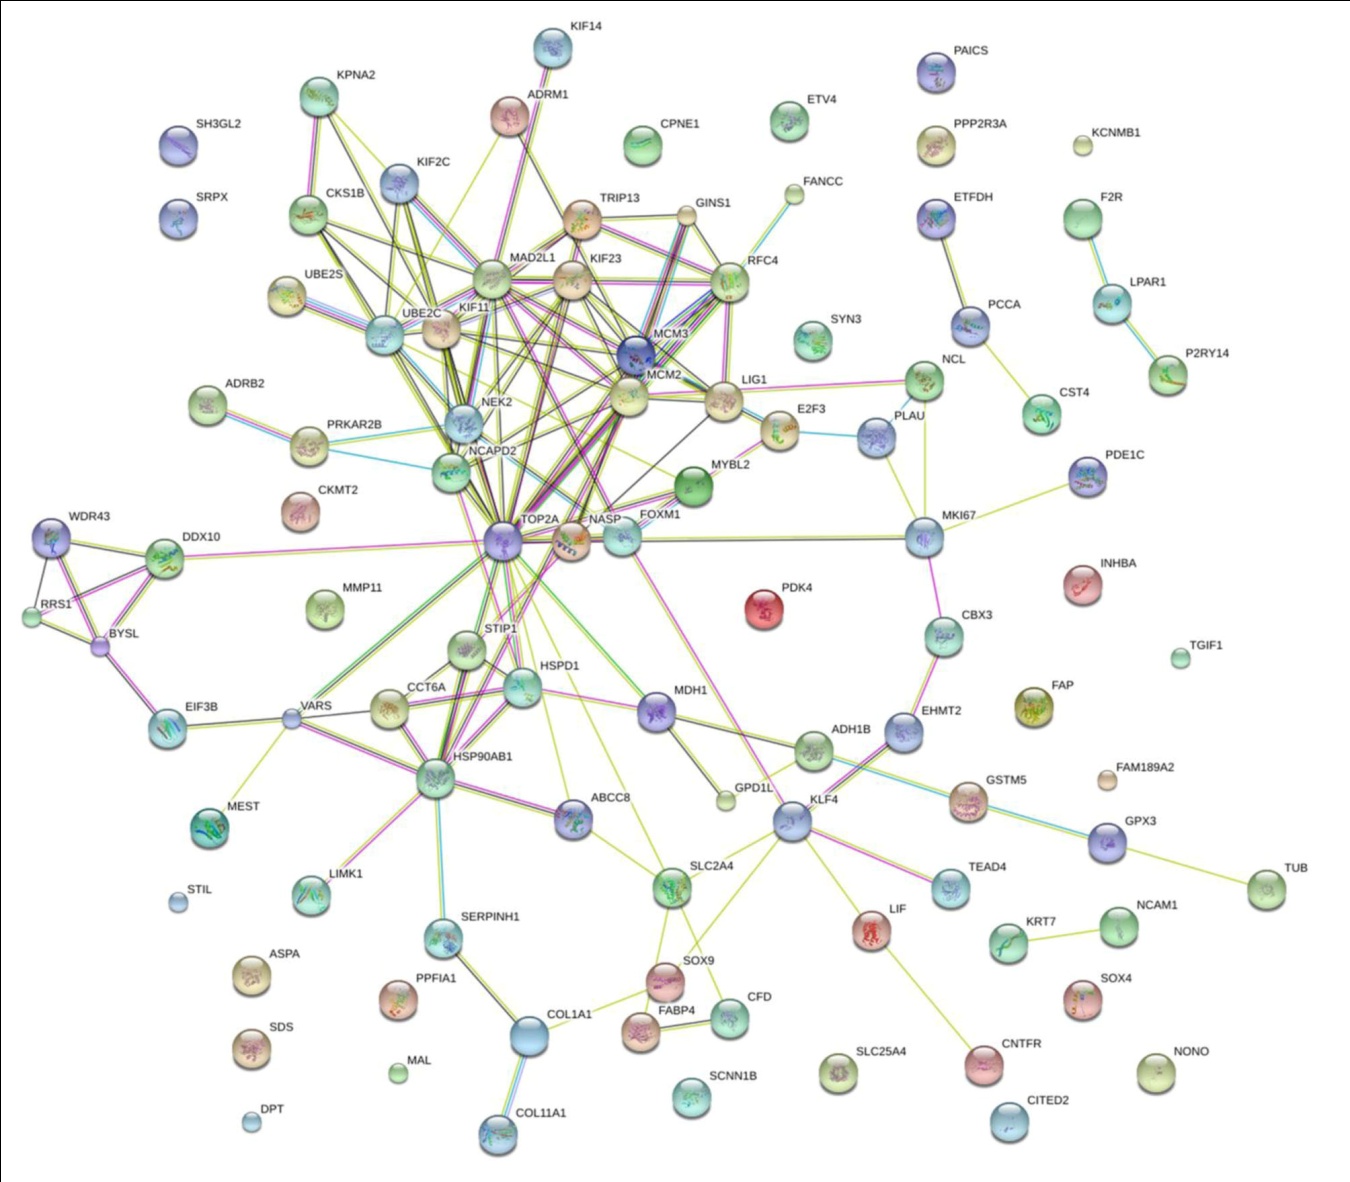


**Supplementary Figure 3.** PPI network of the 96 differentially expressed genes.

Supplementary Table 1. Clustering analysis of genes in PPI network by MCODE.

| Cluster | Score (Density Nodes) | Nodes | Edges | Node IDs |
| --- | --- | --- | --- | --- |
| 1 | 7 | 7 | 21 | KIF11, NCAPD2, TOP2A, MCM3, MCM2, KIF23, **MAD2L1** |
| 2 | 4 | 4 | 6 | RRS1, DDX10, BYSL, WDR43 |
| 3 | 3 | 3 | 3 | NEK2, KIF2C, UBE2C |
| 4 | 3 | 3 | 3 | GINS1, RFC4, TRIP13 |
| 5 | 3 | 3 | 3 | STIP1, CCT6A, HSPD1 |
| 6 | 3 | 3 | 3 | PLAU, MKI67, NCL |
